# Supplementary material for: Understanding the barriers and facilitators related to birthing pool use from organisational and multi-professional perspectives: a mixed-methods systematic review
Source: Reprod Health. 2023 Oct 4;20:147. doi: 10.1186/s12978-023-01690-0 (PMC10548665; doi:10.1186/s12978-023-01690-0)
Supplement: Supplementary file 1 — Additional file 1. Searches and Data Extract. [file 12978_2023_1690_MOESM1_ESM.xlsx]

## Sheet: Pilot 1 Medline
Search history sorted by search number ascending
	# ▲	Searches	Results	Type	Actions	Annotations
	1	(policy or policy maker or policy-maker or guideline* or protocol).ab. or (policy or policy maker or policy-maker or guideline* or protocol).ti.	877320	Advanced	Display Results
					More
	2	(midwife or midwives or midwifery or obstetri* or anaesth*or paediatric* or neonat*).ab. or (midwife or midwives or midwifery or obstetri* or anaesth*or paediatric* or neonat*).ti.	379454	Advanced	Display Results
					More
	3	(water birth or water?birth or birthing pool or under water birth or birthing pool).ab. or (water birth or water?birth or birthing pool or under water birth or birthing pool).ti.	230	Advanced	Display Results
					More
	4	(view or perspective or perception or belief or experience or attitude).ab. or (view or perspective or perception or belief or experience or attitude).ti.	1388684	Advanced	Display Results
					More
	5	1 or 4	2178309	Advanced	Display Results
					More
	6	2 and 3	117	Advanced	Display Results
					More
	7	1 and 2 and 3 and 4	5	Advanced	Display Results
					More
	8	2 and 3 and 4	37	Advanced	Display Results
					More

## Sheet: Pilot 2 CINAHL
Search ID#	Search Terms	Search Options	Actions
	S7	S1 AND S3 AND S4	Expanders - Apply equivalent subjects	View Results (53)				midwife* or midwives or midwifery or obstetri* or nurs* or anaesth*or paediatric* or neonat*
			Search modes - Boolean/Phrase	View Details
				Edit				water birth or water?birth or birthing pool or under water birth or birthing pool or tub
	S6	S1 AND S3	Expanders - Apply equivalent subjects	View Results (150)
			Search modes - Boolean/Phrase	View Details				view or perspective or perception or belief or experience or attitude
				Edit
	S5	S1 AND S2	Expanders - Apply equivalent subjects	View Results (125)
			Search modes - Boolean/Phrase	View Details
				Edit
	S4	TI ( view or perspective or perception or belief or experience or attitude ) OR AB ( view or perspective or perception or belief or experience or attitude )	Expanders - Apply equivalent subjects	View Results (641,738)
			Search modes - Boolean/Phrase	View Details
				Edit
	S3	TI ( water birth or water?birth or birthing pool or under water birth or birthing pool or tub ) OR AB ( water birth or water?birth or birthing pool or under water birth or birthing pool or tub )	Expanders - Apply equivalent subjects	View Results (648)
			Search modes - Boolean/Phrase	View Details
				Edit
	S2	TI ( water birth or water?birth or birthing pool or under water birth or birthing pool ) OR AB ( water birth or water?birth or birthing pool or under water birth or birthing pool )	Expanders - Apply equivalent subjects	View Results (341)
			Search modes - Boolean/Phrase	View Details
				Edit
	S1	TI ( midwife* or midwives or midwifery or obstetri* or nurs* or anaesth*or paediatric* or neonat* ) OR AB ( midwife* or midwives or midwifery or obstetri* or nurs* or anaesth*or paediatric* or neonat* )	Expanders - Apply equivalent subjects	View Results (652,026)
			Search modes - Boolean/Phrase	View Details
				Edit

## Sheet: Final search terms
midwife* or midwives or midwifery or obstetri* or nurs* or anaesth*or paediatric* or neonat*
water birth or water?birth or birthing pool or under water birth or birthing pool or tub or hydrotherapy

## Sheet: MEDLINE
Search history sorted by search number ascending
	# ▲	Searches	Results	Type	Actions	Annotations
	1	(midwife* or midwives or midwifery or obstetri* or nurs* or anaesth*or paediatric* or neonat*).ab. or (midwife* or midwives or midwifery or obstetri* or nurs* or anaesth*or paediatric* or neonat*).ti.	825786	Advanced	Display Results
					More
	2	(water birth or water?birth or birthing pool or under water birth or birthing pool or tub or hydrotherapy).ab. or (water birth or water?birth or birthing pool or under water birth or birthing pool or tub or hydrotherapy).ti.	2634	Advanced	Display Results
					More
	3	1 and 2	213	Advanced	Display Results
					More

## Sheet: MEDLINE 2022
1	(midwife* or midwives or midwifery or obstetri* or nurs* or anaesth*or paediatric* or neonat*).mp. [mp=title, abstract, original title, name of substance word, subject heading word, floating sub-heading word, keyword heading word, organism supplementary concept word, protocol supplementary concept word, rare disease supplementary concept word, unique identifier, synonyms]	1250906	Advanced	Display Results
				More
	2	(water birth or water?birth or birthing pool or under water birth or birthing pool or tub or hydrotherapy).mp. [mp=title, abstract, original title, name of substance word, subject heading word, floating sub-heading word, keyword heading word, organism supplementary concept word, protocol supplementary concept word, rare disease supplementary concept word, unique identifier, synonyms]	4966	Advanced	Display Results
					More
	3	1 and 2	474	Advanced	Display Results
					More

## Sheet: MEDLINE 2023
	1	(midwife* or midwives or midwifery or obstetri* or nurs* or anaesth*or paediatric* or neonat*).mp. [mp=title, book title, abstract, original title, name of substance word, subject heading word, floating sub-heading word, keyword heading word, organism supplementary concept word, protocol supplementary concept word, rare disease supplementary concept word, unique identifier, synonyms, population s…	1303369	Advanced	Display Results		NO FURTHER STUDIES FOUND
					More
	2	limit 1 to yr="2022 - 2023"	67512	Advanced	Display Results
					More
	3	(water birth or water?birth or birthing pool or under water birth or birthing pool or tub or hydrotherapy).mp. [mp=title, book title, abstract, original title, name of substance word, subject heading word, floating sub-heading word, keyword heading word, organism supplementary concept word, protocol supplementary concept word, rare disease supplementary concept word, unique identifier, synonyms, …	5223	Advanced	Display Results
					More
	4	limit 3 to yr="2022 - 2023"	329	Advanced	Display Results
					More
	5	2 and 4	36	Advanced	Display Results
					More

## Sheet: CINAHL
Search ID#	Search Terms	Search Options	Actions
	S3	S1 AND S2	Expanders - Apply equivalent subjects	View Results (200)
			Search modes - Boolean/Phrase	View Details
				Edit
	S2	TI ( water birth or water?birth or birthing pool or under water birth or birthing pool or tub or hydrotherapy ) OR AB ( water birth or water?birth or birthing pool or under water birth or birthing pool or tub or hydrotherapy )	Expanders - Apply equivalent subjects	View Results (1,148)
			Search modes - Boolean/Phrase	View Details
				Edit
	S1	TI ( midwife* or midwives or midwifery or obstetri* or nurs* or anaesth*or paediatric* or neonat* ) OR AB ( midwife* or midwives or midwifery or obstetri* or nurs* or anaesth*or paediatric* or neonat* )	Expanders - Apply equivalent subjects	View Results (652,026)
			Search modes - Boolean/Phrase	View Details
				Edit

## Sheet: CINAHL 2022
Search ID#	Search Terms	Search Options	Actions
	S3	("water birth or water?birth or birthing pool or under water birth or birthing pool or tub or hydrotherapy" OR (MH "Birth Place") OR (MH "Term Birth") OR (MH "Alternative Birth Centers") OR (MH "Water Birth")) AND (S1 AND S2)	Expanders - Apply related words; Apply equivalent subjects	View Results (596)
			Search modes - Boolean/Phrase	View Details
				Edit
	S2	"water birth or water?birth or birthing pool or under water birth or birthing pool or tub or hydrotherapy" OR (MH "Birth Place") OR (MH "Term Birth") OR (MH "Alternative Birth Centers") OR (MH "Water Birth")	Expanders - Apply related words; Apply equivalent subjects	View Results (4,390)
			Search modes - Boolean/Phrase	View Details
				Edit
	S1	"midwife* or midwives or midwifery or obstetri* or nurs* or anaesth*or paediatric* or neonat*" OR (MH "Midwives") OR (MH "Midwifery Service") OR (MH "Midwife Attitudes") OR (MH "Students, Midwifery") OR (MH "American College of Nurse-Midwives") OR (MH "Royal College of Midwives")	Expanders - Apply related words; Apply equivalent subjects	View Results (20,662)
			Search modes - Boolean/Phrase	View Details
				Edit

## Sheet: CINAHL 2023
Accessibility Information and Tips
Print Search History
	Friday, April 14, 2023 12:03:37 PM
#	Query	Limiters/Expanders	Last Run Via	Results
S4	S1 AND S2	Limiters - Published Date: 20220101-20231231	Interface - EBSCOhost Research Databases	19
		Expanders - Apply equivalent subjects	Search Screen - Advanced Search		1 EXTRA PAPER
		Search modes - Boolean/Phrase	Database - CINAHL
S3	S1 AND S2	Expanders - Apply equivalent subjects	Interface - EBSCOhost Research Databases	235
		Search modes - Boolean/Phrase	Search Screen - Advanced Search
			Database - CINAHL
S2	TI ( water birth or water?birth or birthing pool or under water birth or birthing pool or tub or hydrotherapy ) OR AB ( water birth or water?birth or birthing pool or under water birth or birthing pool or tub or hydrotherapy )	Expanders - Apply equivalent subjects	Interface - EBSCOhost Research Databases	1324
		Search modes - Boolean/Phrase	Search Screen - Advanced Search
			Database - CINAHL
S1	TI ( midwife* or midwives or midwifery or obstetri* or nurs* or anaesth*or paediatric* or neonat* ) OR AB ( midwife* or midwives or midwifery or obstetri* or nurs* or anaesth*or paediatric* or neonat* )	Expanders - Apply equivalent subjects	Interface - EBSCOhost Research Databases	718252
		Search modes - Boolean/Phrase	Search Screen - Advanced Search
			Database - CINAHL

## Sheet: PsychInfo
	# ▲	Searches	Results	Type	Actions	Annotations
	1	(midwife* or midwives or midwifery or obstetri* or nurs* or anaesth*or paediatric* or neonat*).ab. or (midwife* or midwives or midwifery or obstetri* or nurs* or anaesth*or paediatric* or neonat*).ti.	126840	Advanced	Display Results
					More
	2	(water birth or water?birth or birthing pool or under water birth or birthing pool or tub or hydrotherapy).ab. or (water birth or water?birth or birthing pool or under water birth or birthing pool or tub or hydrotherapy).ti.	226	Advanced	Display Results
					More
	3	1 and 2	17	Advanced	Display Results
					More

[truncated: 19 more sheets: PsychInfo 2022, PsychInfo 2023, Emcare, Emcare 2022, WOS, WOS 2022, ProQuest, Results, Source full text, Source full text 2, Total full text, Abstract Screening, Full Text Consensus, For Data Extraction, Final after Data Extraction, Colour Coding, First order coding, Second order coding, Categories]
