# Supplementary material for: Understanding the barriers and facilitators related to birthing pool use from organisational and multi-professional perspectives: a mixed-methods systematic review
Source: Reprod Health. 2023 Oct 4;20:147. doi: 10.1186/s12978-023-01690-0 (PMC10548665; doi:10.1186/s12978-023-01690-0)
Supplement: Supplementary file 2 — Additional file 2. QA. [file 12978_2023_1690_MOESM2_ESM.xlsx]

## Sheet: Included papers
No	Author and date	Aim (s)	Overarching research design (if MM or from wider study)	Research design for QA	Comments	Consensus grade (for each paper) A-D
1	Almoghrabi, H, 2018	The purpose of this study is to generate scientific knowledge regarding the US CNM’s/ CM’s and student midwife’s Knowledge, Attitude, and Practice (KAP) of water birth (WB).	Quantitative	Quantitative survey
2	Baba, K., et al., 2016	The objective of this study was to cross-sectional survey policy implementation regarding care during the second stage of labor at Japanese hospitals, clinics, and midwifery birth centers, and to compare those	Quantitative	Quantitative survey
3	Barasinski, C., et al., 2018	The objective of the study was to describe the practices reported by French midwives during labor (first stage and passive phase of the second stage).	Quantitative	Quantitative survey
4	Baxter L., 2006	This article describes how the project evolved and aims to	Audit	Audit	n/a
5	Bayes, S., et al., 2019	The objective of this study was to investigate midwives’ experiences of leading practice change.	Qualitative	Qualitative
6	Carolan-Olah, M., et al., 2015	This project aimed to explore midwives' experiences and views of the factors that facilitate or impede normal birth in a hospital setting.	Qualitative	Qualitative
7	Chapman, B., 2004	Review of protocols for waterbirth obtained from five North Island hospitals in New Zealand compared against available literature.	Qualitative	Qualitative
8	Cooper, M., McCutcheon, H., & Warland, J., 2017*	The aims of the study were to determine how water immersion policies and/or guidelines are informed, who interprets the evidence to inform policies/guidelines and to what extent the policy/ guideline facilitates the option for labour and birth.	Mixed methods (convergent parallel design)	Qualitative
9	Cooper, M., McCutcheon, H., & Warland, J., 2019*	The aims of the study were to determine how water immersion policies and/or guidelines are informed and to what extent the policy/guideline facilitates the option of water immersion for labour and birth with respect to women’s choice and autonomy.	Mixed methods (convergent parallel design)	Qualitative
10	Cooper, M., McCutcheon, H., & Warland, J., 2020*	The purpose of determining the extent to which midwives felt they were able facilitate WI and more, their views of women’s choice and autonomy with respect to the option.	Mixed methods (convergent parallel design)	Mixed methods	Change to mixed methos and amend main paper
11	Cooper, M., Warland, J., & McCutcheon, H., 2018*	The aims of phase three of a larger study were to explore midwives’ knowledge, experiences and support for the option of water immersion for labour and birth in practice and their involvement, if any, in development of policy and guidelines pertaining to the option.	Mixed methods (convergent parallel design)	Quantitative survey
12	Cooper, M., Warland, J., & McCutcheon, H., 2019*	The aim of this study was to examine how accreditation requirements are reflected in policy and guideline documents, how those that were involved in the process of develop and implementation viewed the need for additional training and finally, how midwives’ viewed accreditation requirements withrespect to their ability to uphold women’s autonomy and choice surrounding the practice.	Mixed methods (convergent parallel design)	Qualitative
13	Freeman, L. M. and K. Griew, 2007	The aim of this paper is to show that the allocation of an active voice to the woman within practice guidelines serves the interest of all parties within the health care relationship. To illustrate women’s involvement in decision making within a clinical practice guideline the ‘Use of the Bath in Labour and Birth’.	Qualitative	Qualitative
14	Garland D., 2011	The views of those offering to care for women who wish to labour or give birth in water.	Quantitative	Quantitative survey	Need to exclude- wasn't research or audit
15	Hammond, A., et al., 2014	To explore the impacts of physical and aesthetic design of hospital birth rooms on midwives. This study considers both the hardware (architectural, equipment design) and software (social, aesthetic) aspects of design.	Qualitative	Qualitative
16	Jessiman, W. C. and H. Bryers, 2000	The aim of this study was to examine the professional and educational issues surrounding the installation of the facility (water in labour) in Inverness, and the findings of an audit of the first two years of its use.	Audit	Audit	n/a
17	Lewis L., et al., 2018	The aim was to address this limited research examining midwives' education, knowledge and practice around immersion in water for labour or birth and build knowledge around this important topic.	Mixed methods	Mixed methods
18	Madden, K. L., et al., 2013	To compare the personal preferences of pregnant women, midwives and obstetricians regarding a range of physical, psychosocial and pharmacological methods of pain relief for childbirth.	Quantitative	Quantitative survey
19	Mercredi, A., 2020	To gain a better understanding of the level of support that exists for this practice within the province and explore the overall perceptions and experiences of childbirth HCPs in terms of perceived benefits, risks and barriers toward water birth.	Quantitative	Quantitative survey
20	Meyer, S. L., Weible, C. M., & Woeber, K., 2010	The aim of this study was to examine the perceptions, exposure to, and experience of a sample of Georgia CNMs with Waterbirth.	Quantitative	Quantitative survey
21	Milosevic, S., et al., 2020*	The aim of this study was to identify factors influencing pool use through qualitative case studies of three obstetric units and three midwifery units in the UK.	Mixed methods cohort study	Qualitative
22	Milosevic, S., et al., 2019*	The aim of this study was to identify factors influencing the use of birth pools.	Mixed methods cohort study	Qualitative
23	Muñoz-Sellés, E., et al., 2013	The aims of this study are to describe the professional profile of midwives who provide care for natural childbirth in Catalan hospitals accredited as centres for normal birth, to assess midwives’ levels of training in CAT and their use of these therapies and to identify specific resources for CAT in labour wards.	Quantitative	Quantitative survey
24	Newnham, E. C., McKellar, L. V., & Pincombe, J. I., 2015*	To examine personal, social, institutional and cultural influence on women in their decision to use epidural in labour and a comparison of policy and information pamphlets for using epidural or water in labour	Qualitative (ethnography, multi components)	Qualitative
25	Newnham, E., McKellar, L., & Pincombe, J., 2017*	To investigate personal, social, institutional and cultural influences on women making decisions about using epidural analgesia in labour which we juxtapose with similar processes relating to use of water for labour and/or birth.	Qualitative (ethnography, multi components)	Qualitative
26	Nicholls, S., et al., 2016	The aim of this study was to capture midwives’ perceptions of becoming and being confident in conducting waterbirth in addition to the factors perceived to inhibit and facilitate the development of that confidence.	Qualitative	Qualitative
27	Orrantia, E. and C. Petrick, 2020	This study sought to understand the beliefs and perspectives of women in northern Ontario and their obstetrical providers with respect to water birthing as access to this service is limited in this region.	Quantitative	Quantitative survey
28	Pagano, E., et al., 2010	To assess the cost-effectiveness of water compared with normal delivery.	Quantitative retrospective cohort study	Quantitative cohort study/economic evaluation
29	Plint, E., & Davis, D., 2016	This study aimed to describe and compare the attitudes and practices of midwives and obstetric doctors in a tertiary setting regarding water immersion for labour and birth and to identify strategies for improving bath usage in the facility.	Mixed methods	Mixed methods	Change to quantitative survey and amend main paper
30	Russell, K., 2011*	To share the findings from an ongoing action research study aimed at identifying inequalities in the availability of water birth on one hospital labour ward.	Mixed methods (action research)	Qualitative
31	Russell, K., et al., 2014*	To share the questionnaire findings from an ongoing action research study which focused on improving the availability of hydrotherapy and waterbirth in one UK labour ward.	Mixed methods (action research)	Quantitative
32	Seibold, C., et al., 2010	To explore and describe midwives’ perceptions of birth space and clinical risk management and their impact on practice both before and after a move to a new facility.	Qualitative	Qualitative
33	Stark, M. A. and M. G. Miller, 2009*	To determine nurses’ perceived barriers to the use of hydrotherapy in labour.	Quantitative (2-part? See comments)	Quantitative survey
34	Stark, M. A., & Miller, M. G., 2010*	To develop and test an instrument of nurses’ perceptions of the barriers to the use of hydrotherapy in labour. (Nurses’ Perceptions of the Use of Hydrotherapy in Labor (NPUHL) questionnaire.	Quantitative (2-part? See comments)	Quantitative survey
35	Sushma, Y., et al., 2019	To assess the level of knowledge of waterbirth among staff nurses at NRI general hospital, Chinakakni Guntur district Andhra Pradesh with their demographic variables.	Quantitative	Quantitative survey
36	Ulfsdottir, H., Saltvedt, S., & Georgsson, S., 2020	To explore the experiences, knowledge and attitudes regarding waterbirth among midwives, obstetricians/ gynecologists and neonatologists.	Mixed methods	Mixed methods
37	Way, S. E., 2015 (THESIS)	To specifically examine perceived barriers to attending waterbirth as reported by survey respondents (CNM midwives).	Quantitative	Quantitative survey
38	Woodward, J. L., 2012	To investigate the feasibility of a waterbirth RCT to assess the effects of a waterbirth on the neonate, to explore women’s thoughts about participation and whether randomisation affects women’s satisfaction with their childbirth experience and to assess midwives’ attitudes to waterbirths.	Mixed methods	Qualitative (only review the chapter/methodology with interview data from the midwives)

## Sheet: Qual
Author (year)	Aims clear?	Participants appropriate for question ?	Design appropriate for aims and theoretical perspective?	Methods appropriate for design?	Sample size & sampling justified?	Does the data analysis fit with the chosen methodology?	Reflexivity present?	Study ethical	Do the data presented justify the findings?	Is the context described sufficiently?	Is there sufficient evidence of rigour ?	Consensus grade
Bayes, S., et al., 2019	yes	yes	yes	yes	yes	yes	not reported	yes	yes	yes	yes	A/B
Carolan-Olah, M., et al., 2015	yes	yes	yes	yes	yes	yes	not reported	yes	yes	yes	yes	A/B
Chapman, B., 2004	yes	n/a	yes	yes	n/a	unclear	not reported	yes	yes	yes	limited reporting	B/C
Cooper, M., McCutcheon, H., & Warland, J., 2017*	yes	yes	yes	yes	yes	yes	not reported	yes	yes	yes	yes	A/B	rich theoretical underpinnings and rich findings
Cooper, M., McCutcheon, H., & Warland, J., 2019*	yes	yes	yes	yes	yes	yes	yes	yes	yes	yes	yes	A	rich theoretical underpinnings and rich findings
Cooper, M., Warland, J., & McCutcheon, H., 2019*	yes	yes	yes	yes	yes	yes	yes	yes	yes	yes	yes	A	rich theoretical underpinnings and rich findings
Freeman, L. M. and K. Griew, 2007	yes	yes	yes	yes	not clear	not clear	not reported	n/a	yes	yes	limited reporting	C/D
Hammond, A., et al., 2014	yes	yes	yes	yes	yes/justification not clear	yes	not reported	yes	yes	yes	yes	B	rich findings
Milosevic, S., et al., 2020*	yes	yes	yes	yes	yes	yes	not reported	yes	yes	yes	yes	A	rich findings
Milosevic, S., et al., 2019*	yes	yes	yes	yes	yes	yes	not reported	yes	yes	yes	yes	B	no discussion around rigour/transferrability
Newnham, E. C., McKellar, L. V., & Pincombe, J. I., 2015*	yes	yes	yes	yes	yes	yes	not reported	yes	yes	yes	yes	A	rich theoretical underpinnings and rich findings
Newnham, E., McKellar, L., & Pincombe, J., 2017*	yes	yes	yes	yes	yes	yes	not reported	yes	yes	yes	yes	A	rich theoretical underpinnings and rich findings
Nicholls, S., et al., 2016	yes	yes	yes	yes	yes	yes	not reported	yes	yes	yes	yes	A/B
Russell, K., 2011*	yes	yes	yes	yes	yes	yes	yes	yes	yes	yes	yes but limited reporting	A/B
Seibold, C., et al., 2010	yes	yes	yes	yes	yes	yes	not reported	yes	yes	yes	yes limited reporting	B
Woodward, J. L., 2012	yes	yes	yes	yes	not justified in relation to the method	yes	limited reflexivity	yes	yes	yes	limited reporting	C	(small sample but appropriate for methodology and integrated with lit review findings.)

## Sheet: Survey
Author & year	What information did the researchers seek to obtain?	Was a questionnaire the most appropriate method and if not, what design might have been more appropriate?	Were there any existing measures (questionnaires) that the researchers could have used? If so, why was a new one developed and was this justified?	Were the views of consumers sought about the design, distribution, and administration of the questionnaire?	What claims for validity have been made, and are they justified? (In other words, what evidence is there that the instrument measures what it sets out to measure?)	What claims for reliability have been made, and are they justified? (In other words, what evidence is there that the instrument provides stable responses over time and between researchers?)	Was the title of the questionnaire appropriate and if not, what were its limitations?	What format did the questionnaire take, and were open and closed questions used appropriately?	Were easy, non-threatening questions placed at the beginning of the measure and sensitive ones near the end?	Was the questionnaire kept as brief as the study allowed?	Did the questions make sense, and could the participants in the sample understand them? Were any questions ambiguous or overly complicated?	Did the questionnaire contain adequate instructions for completion—eg example answers, or an explanation of whether a ticked or written response was required?	Were participants told how to return the questionnaire once completed?	Did the questionnaire contain an explanation of the research, a summary of what would happen to the data, and a thank you message?	Was the questionnaire adequately piloted in terms of the method and means of administration, on people who were representative of the study population?	How was the piloting exercise undertaken—what details are given?	In what ways was the definitive instrument changed as a result of piloting?	What was the sampling frame for the definitive study and was it sufficiently large and representative?	Was the instrument suitable for all participants and potential participants? In particular, did it take account of the likely range of physical/mental/cognitive abilities, language/literacy, understanding of numbers/scaling, and perceived threat of questions or questioner?	How was the questionnaire distributed?	How was the questionnaire administered?	Were the response rates reported fully, including details of participants who were unsuitable for the research or refused to take part?	Have any potential response biases been discussed?	What sort of analysis was carried out and was this appropriate? (eg correct statistical tests for quantitative answers, qualitative analysis for open ended questions)	What measures were in place to maintain the accuracy of the data, and were these adequate?	Is there any evidence of data dredging—that is, analyses that were not hypothesis driven?	What were the results and were all relevant data reported?	Are quantitative results definitive (significant), and are relevant non-significant results also reported?	Have qualitative results been adequately interpreted (e.g. using an explicit theoretical framework), and have any quotes been properly justified and contextualised?	Have the researchers drawn an appropriate link between the data and their conclusions?	Have the findings been placed within the wider body of knowledge in the field (eg via a comprehensive literature review), and are any recommendations justified?	Consensus grade
Almoghrabi, H, 2018 (thesis)	The purpose of this study is to generate scientific knowledge regarding the US CNM’s/ CM’s and student midwife’s Knowledge, Attitude, and Practice (KAP) of water birth (WB). The study specifically assesses Midwife and midwifery students’ knowledge and clinical experience, competence and confidence, and sources of support versus barriers to the practice of WB in the workplace.	Yes	Appropriate- modified from Meyer et al	Yes	not reported	not reported	Yes	Closed q's/scale	N/a	Yes	Yes	Yes	Online (automate)	Yes	Yes	Details provided	Minor semantic changes	Purposive, large sample and yes	n/a	online	online	some reporting issues, lack of clarity in some areas	n/a	Basic descriptive statistics	Data cleaning reported	No	Appears to be reported adequately	n/a	n/a	Yes	Yes	B
Baba, K., et al., 2016	to survey policy implementation regarding care during the second stage of labor in hospitals, clinics, and midwifery birth centers in Japan, and to compare the policies with the recommendations by Guidelines for Midwives.	Yes	New questionnaire was developed, justified	Not reported	Validity reported as achieved via 3 midwives and with consensus, unclear if this was effective	not reported	not reported (copy of survey not included)	Closed q's/scale	n/a	appears to be	not reported (copy of survey not included)	not reported	inferred not explicit	inferred not explicit	not reported	not reported		Purposive and appropriate	n/a	postal	paper	yes	n/a	Appropriate	Not reported	No	Appears to be reported adequately	Yes	n/a	yes	yes	C
Barasinski, C., et al., 2018	the objective of our study was to describe the practices reported by French midwives during labor (first stage and passive phase of the second stage).	yes	New questionnaire was developed, justified	Yes	not reported	not reported	yes	Closed q's/scale	n/a	yes	yes	yes	yes	yes	yes	Details provided	not reported	Appropriate	n/a	online	online	yes	n/a	Appropriate	Not reported	No	Appears to be reported adequately	n/a	n/a	yes	yes	B
Cooper, M., McCutcheon, H., & Warland, J., 2020*	The aims of phase three of a larger study were to explore midwives knowledge, experiences and support for the option of water immersion for labour and birth in practice and their involvement, if any, in development of policy and guidelines pertaining to the option.	yes	Appropriate- modified from Meyer et al	Not reported	Validity was achieved by adapting a survey that had previously been used by Meyer et al	Reliability of the adapted tool was achieved by conducting a pilot test–retest15 by 10 individuals who met the inclusion and exclusion criteria	not reported (copy of survey not included)	Closed q's/scale	N/a	yes	not reported (copy of survey not included)	inferred (online survey)	Online (automate)	inferred not explicit	yes	Details provided	Reliability of the adapted tool was achieved by conducting a pilot test–retest15 by 10 individuals who met the inclusion and exclusion criteria. The 10 individuals were registered midwives. Test and retests were issued approximately one hour apart via the online FluidSurveys platform allowing sufficient time for completion. For the purpose of the test–retest, questions that allowed for qualitativ…	purposive and appropriate sample	n/a	online	online	yes	n/a	Appropriate	Not reported	no	Appears to be reported adequately	yes	n/a	yes	yes	A/B
Garland D., 2011	will need to exclude as not research or audit
Madden, K. L., et al., 2013	Our study was undertaken to examine whether there were differences in the personal preferences of midwives, obstetricians and pregnant women regarding a range of physical, psychosocial and pharmacological methods of pain relief for childbirth.	yes	New questionnaire was developed, justified	Yes	not reported	not reported	not reported (copy of survey not included)	Closed q's/scale	n/a	appears to be	not reported (copy of survey not included)	yes reported	yes	inferred not explicit	yes	Details provided	One q removed, another added, and restructuring to reduce the burden for responders	Purposive and appropriate	n/a	postal	paper	yes	yes, thoroughly	Appropriate	Yes discussed and adequate	no	Appears to be reported adequately	yes	n/a	yes	yes	B	no survey attached, no validity discussed
Mercredi, A., 2020	to gain a better understanding of the level of support that exists for this practice within the province and explore the overall perceptions and experiences of childbirth HCPs in terms of perceived benefits, risks and barriers toward water birth	yes	Appropriate- modified from Meyer et al	Yes	Face validity reported/achieved via pilot testing	not reported	Yes	Closed q's/scale	n/a	Yes	Yes	Yes	Online (automate)	Yes	yes	some details provided, not clear as to what exactly changed following piloting	not reported	Purposive, large sample and yes	n/a	online	online	yes	yes, briefly discussed	Appropriate	Data cleaning reported	No	Appears to be reported adequately	Yes	n/a	yes	Yes	B
Meyer, S. L., Weible, C. M., & Woeber, K., 2010	This brief report focuses on the perceptions, exposureto, and experience of a sample of Georgia CNMs withwaterbirth	yes	New questionnaire was developed, justified (and has been used by other researchers since, see above)	yes	Face and content validity reported - through pilot testing	not reported	not reported (copy of survey not included)	Closed q's/scale	n/a	appears to be	not reported (copy of survey not included)	yes inferred	Online (automate)	inferred not explicit	yes	few details provided	not reported	Purposive and appropriate	n/a	online	online	yes	yes, briefly discussed	Appears appropriate, little info provided	Not reported	no	Appears to be reported adequately	Yes	n/a	yes	yes	C
Muñoz-Sellés, E., et al., 2013	Our objectives were to describe the professional profile of midwives who work in delivery rooms in Catalan hospitals that are accredited as centers for normal birth; to determine the level of training and use of CAT by these midwives; and to identify specific resources in the labor wards of accredited Catalan hospitals.	yes	Yes, adapted from two other questionnaires		not reported	not reported	yes	Closed q's/scale	n/a	yes	yes	not reported	not reported	No	Yes	Details provided	Wording (reducing complexity of phrasing)	Purposive and appropriate	n/a	not reported	not reported	yes	n/a	Appropriate	Not reported	No	Appears to be reported adequately	yes	n/a	yes	yes	B/C
Orrantia, E. and C. Petrick, 2020	This study sought to understand the beliefs and perspectives of women in northern Ontario and their obstetrical providers with respect to water birthing as access to this service is limited in this region	yes	Not reported	Not reported	not reported	not reported	not reported (copy of survey not included)	Closed q's/scale	n/a	appears to be	not reported (copy of survey not included)	inferred (data collected by a researcher)	yes RA collected for women, hcps postal SAE	inferred not explicit	not reported	not reported	not reported	Appropriate	n/a	in person/postal	paper	yes	not reported	Appropriate	Not reported	no	Appears to be reported adequately	yes	n/a	yes	yes	C/D	not enough respondents to carry out statistical significance and no referring back to how this would affect the findings
Russell, K., et al., 2014*	The aim of this paper is to share the questionnaire findings from an on-going Action Research study, which focused on improving the availability of hydrotherapy and waterbirth on one UK labour ward.	yes	Yes adapted from Davies & Hodnett	Yes	Validity of the original instrument reported but acknowledged this adapted tool has not been validated	Reported was found to have a high internal consistency (Cronbach Alpha, 0.97)	not reported (copy of survey not included)	Closed q's/scale	n/a	appears to be	not reported (copy of survey not included)	inferred	yes, inferred for postal but assumed for online	inferred not explicit	yes well described/reported	Details provided	subsections could be combined to form scales that were consistent with current understanding of midwifery waterbirth practice	Appropriate	n/a	postal/online	postal/online	yes	n/a	Appropriate	Not reported	no	Appears to be reported adequately	yes	n/a	yes	yes	A/B
Stark, M. A. and M. G. Miller, 2009*																																A/B
Stark, M. A., & Miller, M. G., 2010*	The purpose of this study was to develop and test an instrument of nurses perceptions of barriers to the use of hydrotherapy in labor.	yes	New questionnaire developed for this	Yes	reviewed for face and content validity	Reliability Assessement meant that five items were deleted for lack of variability in answers	not reported (copy of survey not included)	Closed q's/scale	n/a	yes	not reported (copy of survey not included)	inferred (online survey)	Online (automate)	inferred not explicit	Yes, well described	Details provied and whole publication describes this process	Extensive discussion but in brief following evaluation of the instrument in phase I testing, nine items were deleted from the NPUHL, and two shower items were deleted. Thirty	Purposive and appropriate	n/a	postal/online	postal/online	yes	yes	Appropriate	Data cleaning reported	no	Appears to be reported adequately	Yes	n/a	yes	yes	A/B
Sushma, Y., et al., 2019	To assess the knowledge of staff nurses regarding water birth.	yes	New questionnaire developed but not well justified	Yes	reviewed for content validity	was established by using split half method	not reported (copy of survey not included)	Closed q's/scale	n/a	appears to be	not reported (copy of survey not included)	not reported	not reported	not reported	not reported	not reported	not reported	Appropriate	n/a	not reported	not reported	n/a puposrive and convenience sample	not reported	Appropriate	Not reported	no	Appears to be reported adequately	Yes	n/a	inadequate	inadequate	D
Way, S. E., 2015 (THESIS)	The study’s aims were to assess CNM and CM views of and experiences with water labor and waterbirth, perceived facilitators and barriers to water labor and waterbirth in the U.S., the impact of AAP-ACOG and/or other published guidelines on the availability of waterbirth, and ACNM members’ preferences about the organization’s engagement with intrapartum hydrotherapy	yes	Adapted from Meyer	Yes	Not achieved	not reported	“Waterbirth knowledge, practices and preferences among American College of Nurse-Midwives members.” - Appropriate	Closed q's/scale	n/a	appears to be	yes	inferred (online survey)	Online (automate)	inferred not explicit	not reported	not reported	not reported	Appropriate	n/a	online	online	yes	yes discussed	Appropriate	Duplicate responses were checked for	No	Appears to be reported adequately	Yes	n/a	yes	yes	C
Plint, E., & Davis, D., 2016	This study aimed to describe and compare the attitudes and practices of midwives and obstetric doctors in a tertiary setting regarding water immersion for labor and birth and to identify strategies for improving bath usage in the facility.	yes	Adapted from Ruessell	Yes	retested for face and content validity	not reported	not reported (copy of survey not included)	closed q's/scale/open ended	n/a	appears to be	not reported (copy of survey not included)	inferred not explicit	Inferred	inferred not explicit	yes	not reported	not reported	Appropriate	n/a	postal/online	postal/online	some information provided	n/a	Appropriate	Not reported	no	Appears to be reported adequately	Yes	yes	yes	yes	A/B
published main findings first, before pilot tool, for purposes of QA have treated this as one.

## Sheet: MM
Author & year	Is there an adequate rationale for using a mixed methods design to address the research question?	Are the different components of the study effectively integrated to answer the research question?	Are the outputs of the integration of qualitative and quantitative components adequately interpreted?	Are divergences and inconsistencies between quantitative and qualitative results adequately addressed?	Do the different components of the study adhere to the quality criteria of each tradition of the methods involved?	Grade
Lewis L., et al., 2018	Yes well justified	Yes	Adequately presented but unclear integration between the quant and qual	Not applicable	Appears so	B
Ulfsdottir, H., Saltvedt, S., & Georgsson, S., 2020	Not reported	Yes	Yes extremely well integrated	Less applicable but divergent views across the dataset and data collection methods well managed, integrated and discussed.	Yes	B
Cooper, M., Warland, J., & McCutcheon, H., 2018*	Yes, briefly justified	Yes	Yes extremely well integrated	Not applicable	Yes	A

## Sheet: Economic evaluation
Author/Date Pagano, E., et al., 2010	Yes	No	Can’t tell	N/a	Comments	Overall grade A/B
IS THE ECONOMIC EVALUATION LIKELY TO BE USABLE?
1. Was a well-defined question posed in an answerable form? (Is it clear what the authors were trying to do?)	x
2. Was a comprehensive description of the competing alternatives given (i.e. can you tell who did what to whom, where and how often)?	x
3. Was there evidence that the programme’s effectiveness had been established?	x
Consider:
· Was the study attached to the economic evaluation an RCT?		x	cohort study
· How valid was the study design used? (N.B. You may want to appraise it using an appropriate checklist).	x
HOW WERE OUTCOMES AND COSTS ASSESSED AND COMPARED?
4. Were all the important and relevant outcomes and costs for each alternative identified?	x
Consider:
· What perspective(s) was/were taken, e.g. health service, patient, society.	x		cost/perineal trauma cost
5. Were outcomes and costs measured accurately in appropriate units (e.g. hours of nursing time, number of physician visits, years-of-life gained) prior to evaluation?	x
6. Were the outcomes and costs valued credibly?	x
Consider:
· Were opportunity costs considered?		x
7. Were outcomes and costs adjusted for different times at which they occurred (discounting)?				x?
8. Was an incremental analysis of the outcomes and costs of alternatives performed?				x
9. Was a sensitivity analysis performed?			x
Consider:
· Were all the main areas of uncertainty considered?	x
WILL THE RESULTS HELP IN PURCHASING FOR LOCAL PEOPLE?
10. Did the presentation and discussion of the results include all, or enough, of the issues that are of concern to purchasers?	x
11. Were the conclusions of the evaluation justified by the evidence presented?	x
12. Can the results be applied to the local population?	x
Consider:
· Are the patients similar enough to your population?	x
· Is your local setting similar to that in the study?	x
